# Supplementary material for: Genetic variation associated with healthy traits and environmental conditions in Vaccinium vitis-idaea
Source: PubMed Central journal article supplement (PMC5748963; doi:10.1186/s12864-017-4396-9), 2018-01-02

d = 0.1

Mean Summer Temperature

PCo 2

PCo 1

Eigenvalues

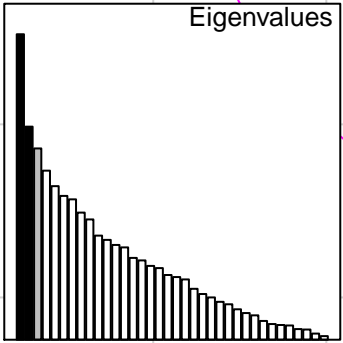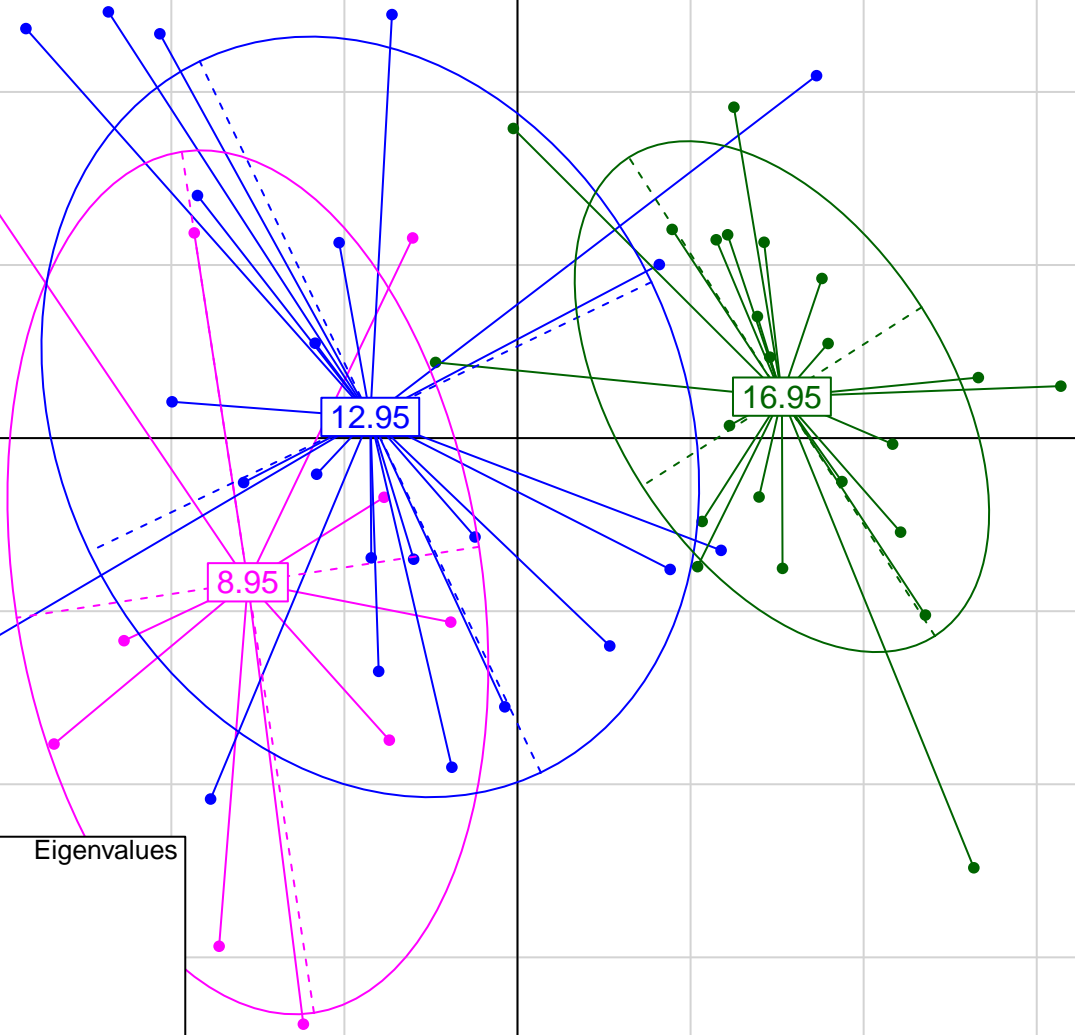

d = 0.2

Mean Annual Precipitation

PCo 2

PCo 1

Eigenvalues

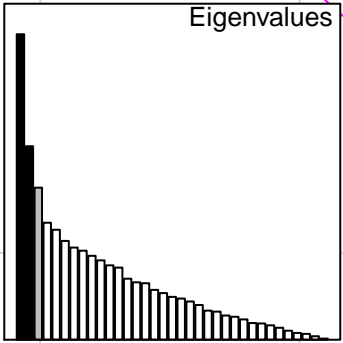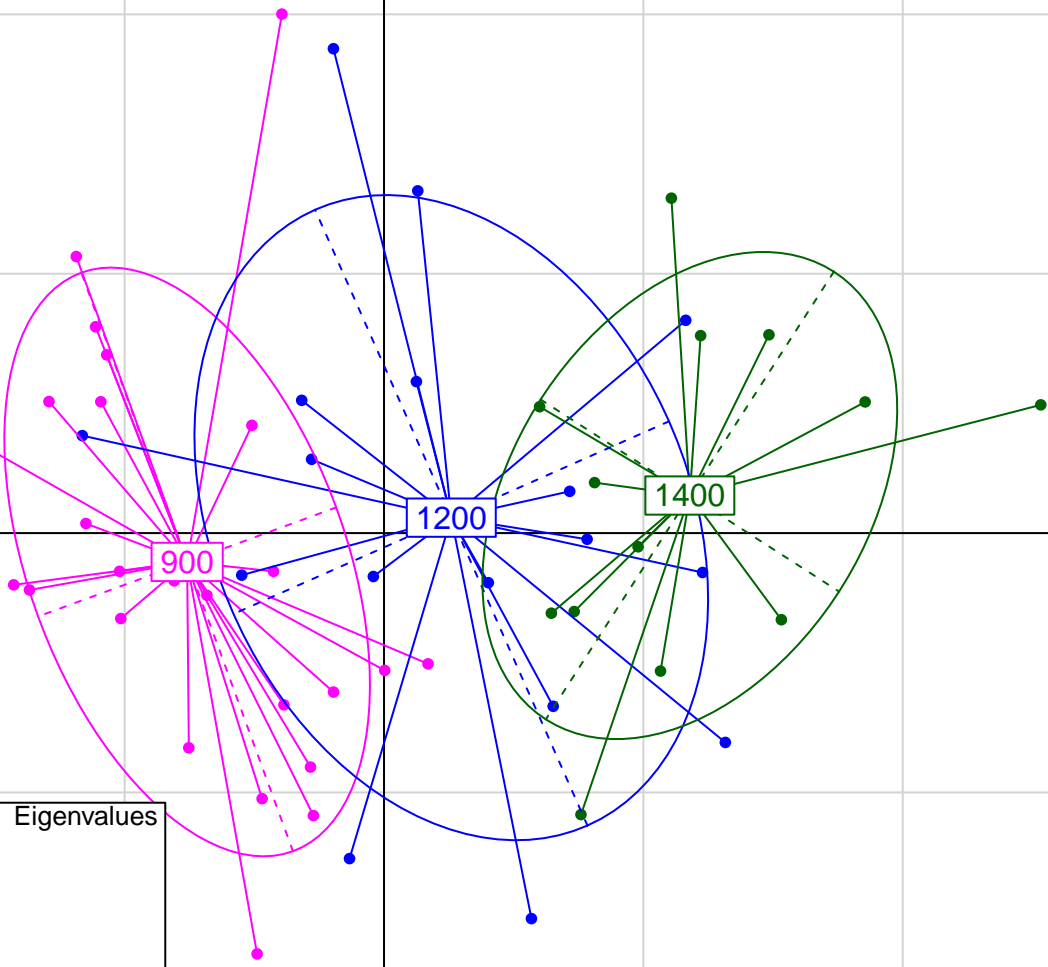

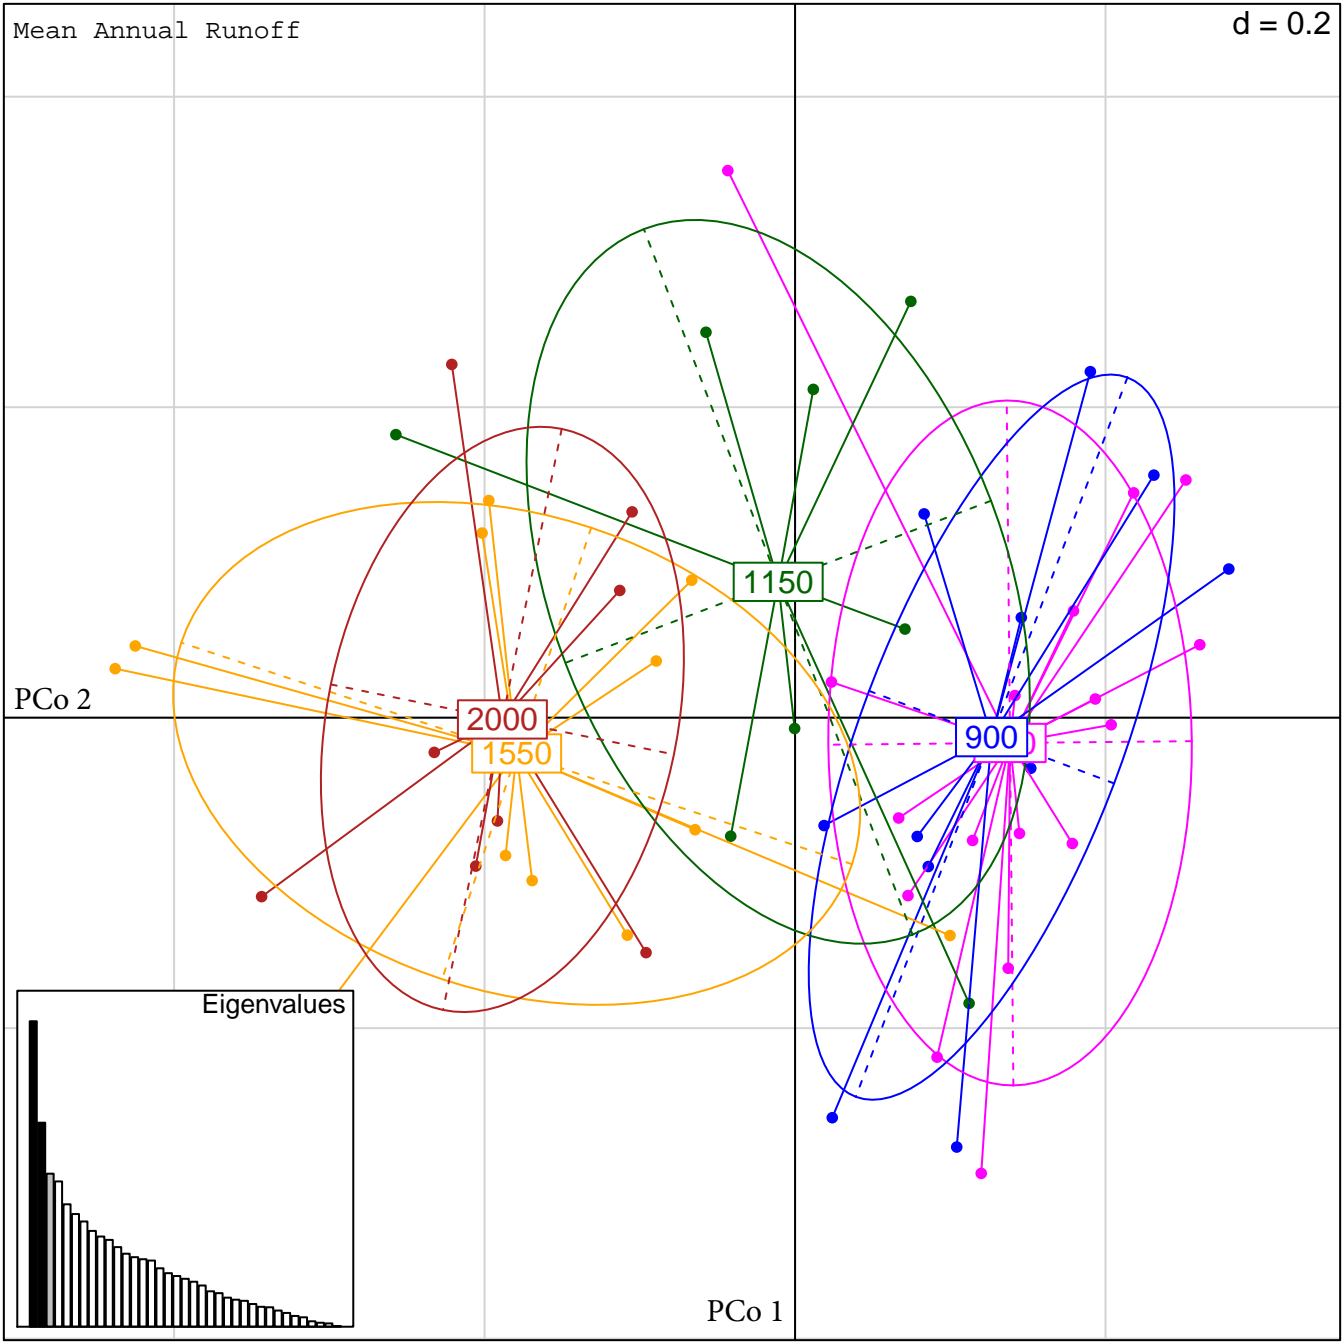

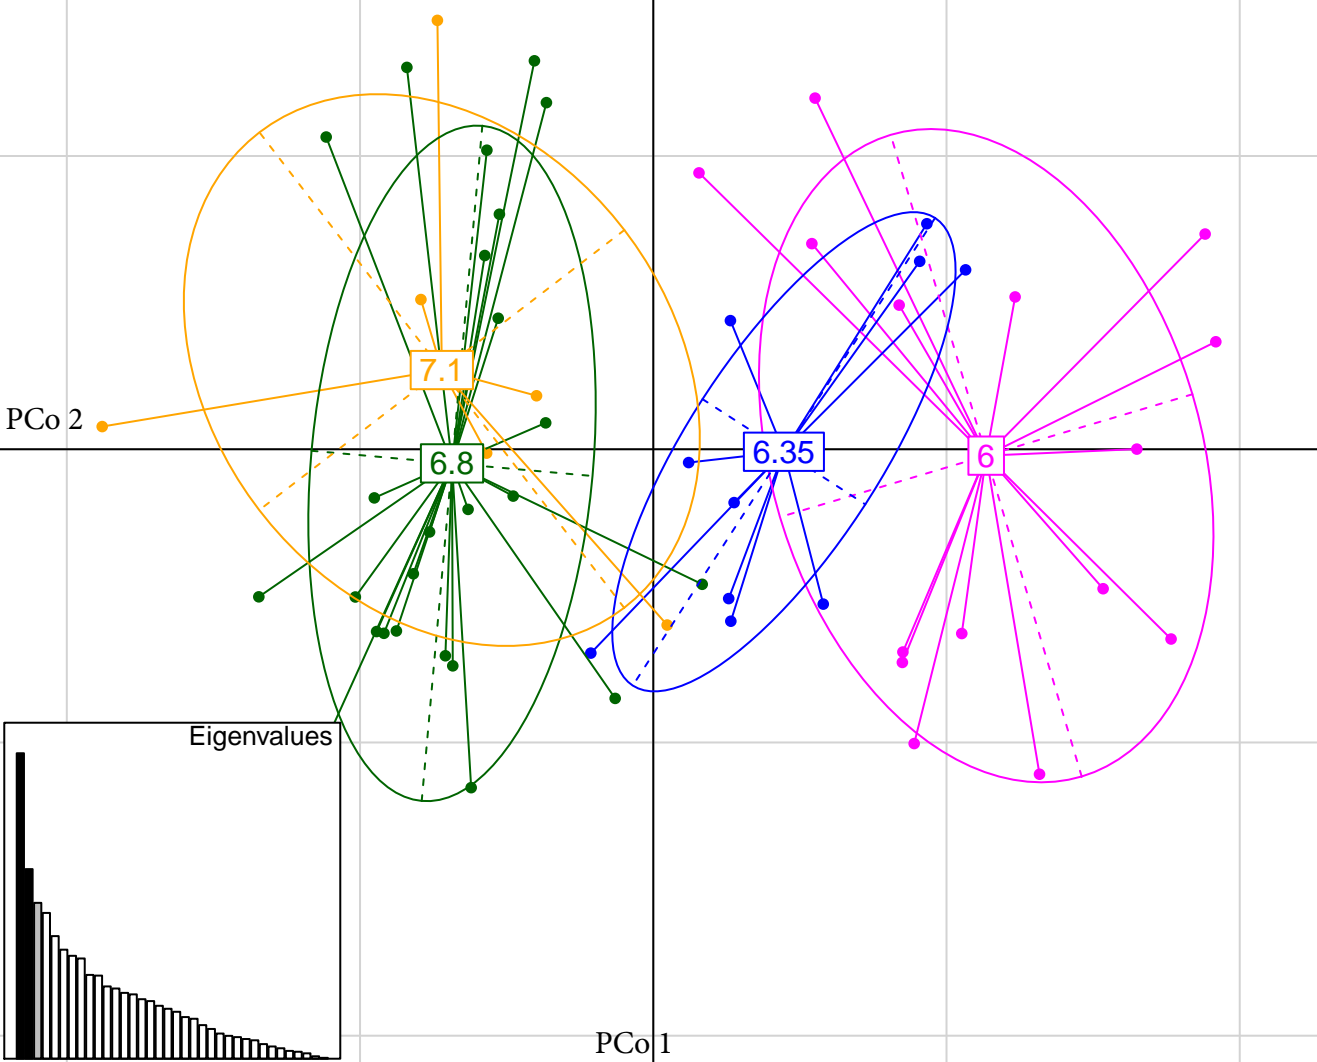

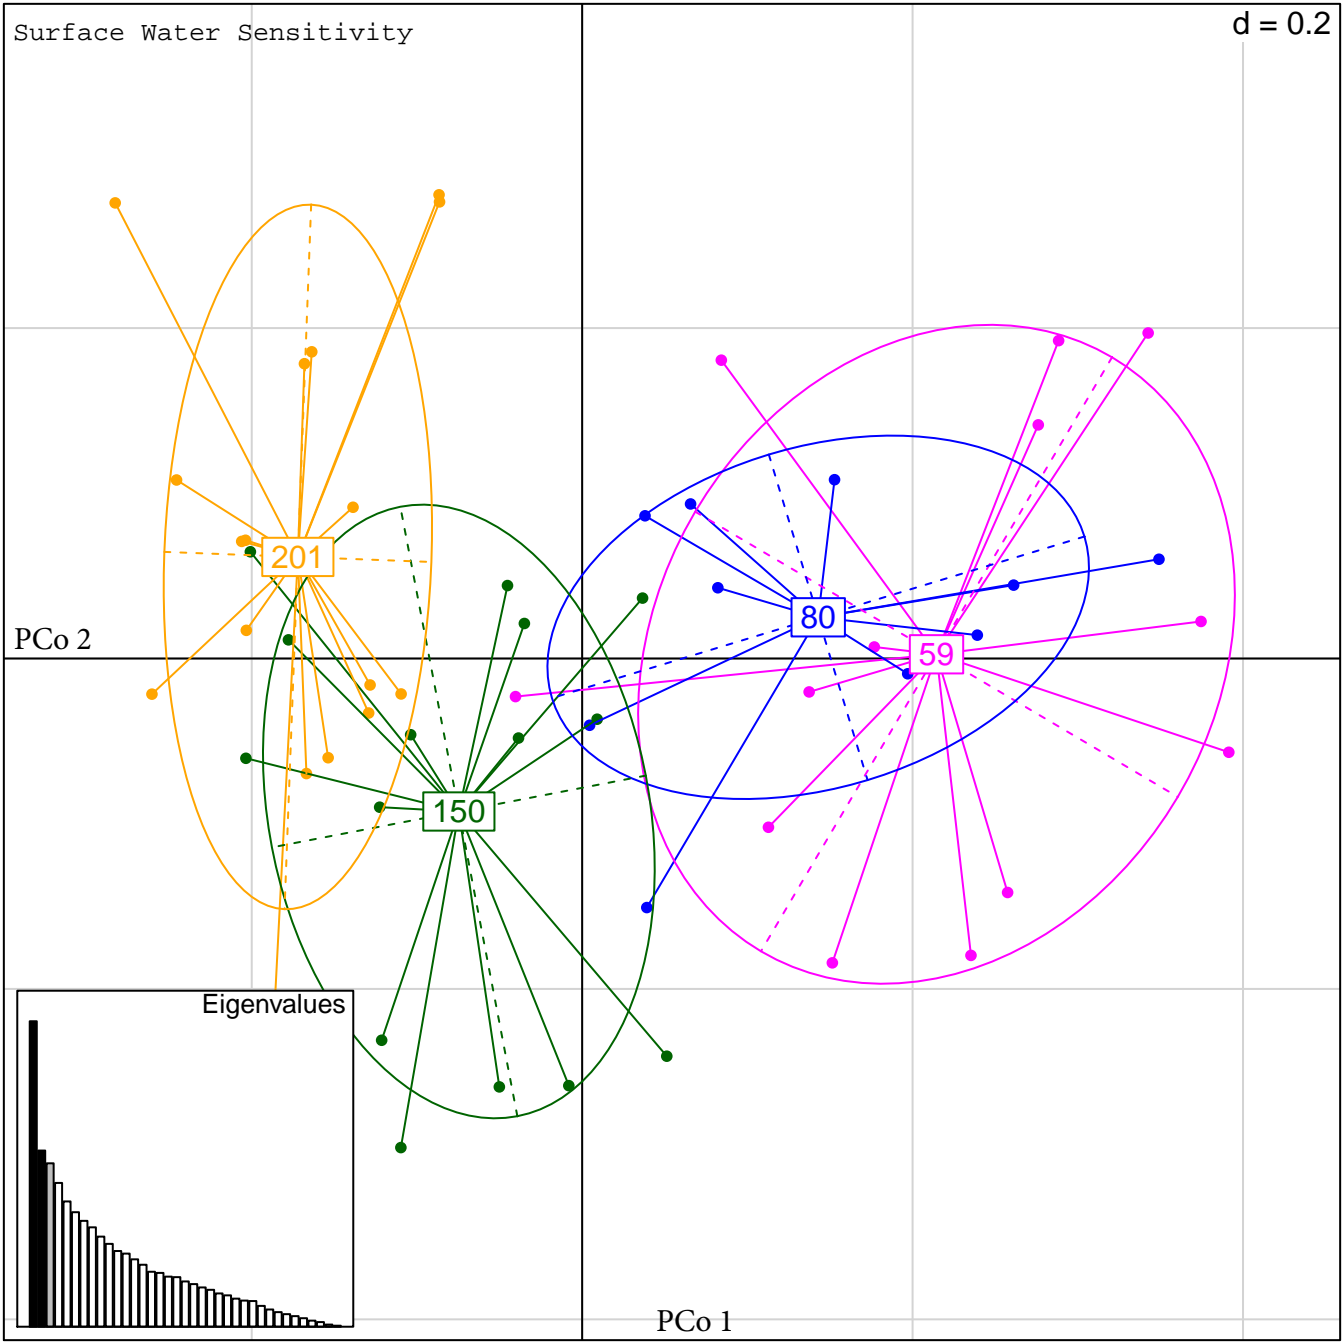

Mean Total Phenolic Content

d = 0.1

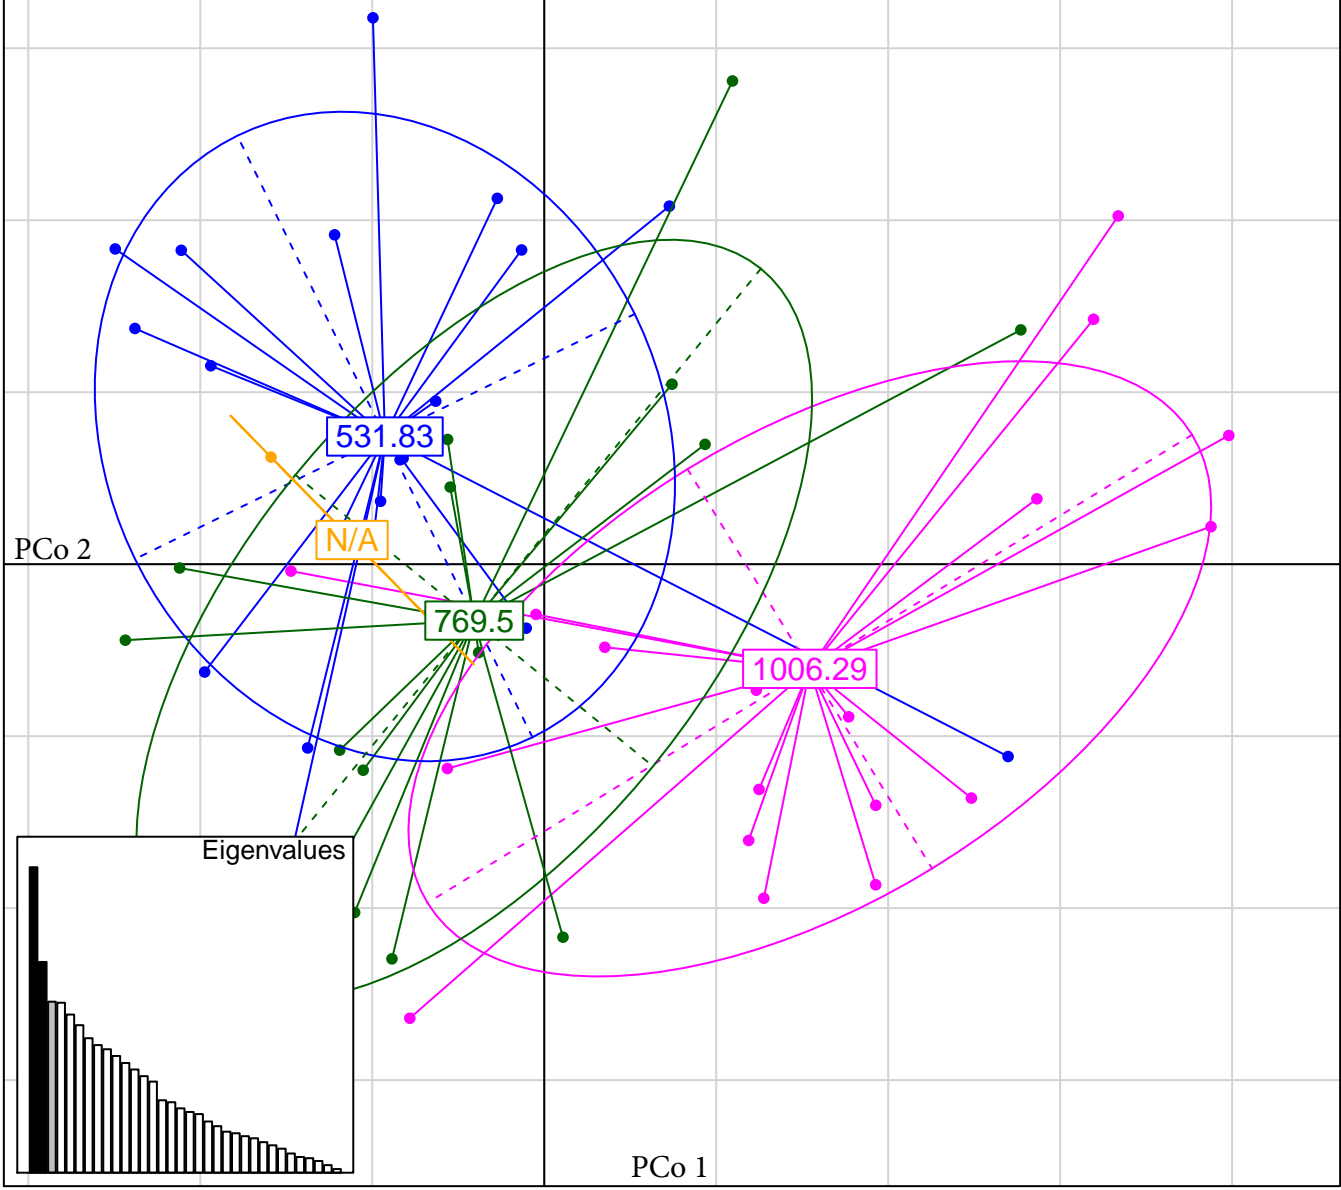

Supplement: 12864_2017_4396_MOESM2_ESM.pdf [file 12864_2017_4396_MOESM2_ESM.pdf]
